# Supplementary material for: Machine Learning-Based Cardiovascular Disease Prediction Model: A Cohort Study on the Korean National Health Insurance Service Health Screening Database
Source: MDPI journal article supplement (doi:10.3390/diagnostics11060943), 2021-05-25
Supplement: s1 [file s1]

1 **Table S1.** Factors used in ML and DL algorithm-based CVD prediction model

| No. | Factor                                   | Data Variables       |
|-----|------------------------------------------|----------------------|
| 1   | Previous Cardiovascular Disease          | HCHK_HDISE_PMH_YN    |
| 2   | Total Cholesterol                        | TOT_CHOLE            |
| 3   | High Density Lipoprotein                 | HDL_CHOLE            |
| 4   | Body Mass Index                          | BMI                  |
| 5   | Waist-to-height ratio                    | WHTR                 |
| 6   | Fasting Blood Sugar                      | BLDS                 |
| 7   | Triglyceride                             | TRIGLYCERIDE         |
| 8   | Hemoglobin                               | HMG                  |
| 9   | SGPT                                     | SGPT_ALT             |
| 10  | $\gamma$ GTP                             | GAMMA_GTP            |
| 11  | Sex                                      | SEX                  |
| 12  | Age Group                                | AGE_GROUP            |
| 13  | Systolic Blood Pressure                  | BP_HIGH              |
| 14  | Diastolic Blood Pressure                 | BP_LWST              |
| 15  | Low Density Lipoprotein                  | LDL_CHOLE            |
| 16  | Urine Protein                            | OLIG_PROTE_CD        |
| 17  | Creatinine                               | CREATININE           |
| 18  | SGOT                                     | SGOT_AST             |
| 19  | Past History of Hypertension             | HCHK_HPRTS_PMH_YN    |
| 20  | Family History of Cardiovascular disease | FMLY_HDISE_PATIEN_YN |
| 21  | More than 30 min Walking per a week      | WLK30_WEK_FREQ_ID    |
| 22  | Past History of Stroke                   | HCHK_APOP_PMH_YN     |
| 23  | Past History of Diabetes                 | HCHK_DIABML_PMH_YN   |

---

|    |                                               |                       |
|----|-----------------------------------------------|-----------------------|
| 24 | Past History of Hyperlipidemia                | HCHK_HPLPDM_PMH_YN    |
| 25 | Past History of Pulmonary Tuberculosis        | HCHK_PHSS_PMH_YN      |
| 26 | Other Past Histories                          | HCHK_ETCDSE_PMH_YN    |
| 27 | Family History of Stroke                      | FMLY_APOP_PATIEN_YN   |
| 28 | Family History of Hypertension                | FMLY_HPRTS_PATIEN_YN  |
| 29 | Family History of Diabetes                    | FMLY_DIABML_PATIEN_YN |
| 30 | Family History of Cancer                      | FMLY_CANCER_PATIEN_YN |
| 31 | Past Smoking Period                           | PAST_SMK_TERM_RSPS_CD |
| 32 | Past Daily Smoking                            | PAST_DSQTY_RSPS_CD    |
| 33 | Current Smoking Period                        | CUR_SMK_TERM_RSPS_CD  |
| 34 | Current Daily Smoking                         | CUR_DSQTY_RSPS_CD     |
| 35 | Drinking Habit                                | DRNK_HABIT_RSPS_CD    |
| 36 | Intake Volume in one Drinking Session         | TM1_DRKQTY_RSPS_CD    |
| 37 | Vigorous Exercise more than 20 min per a week | MOV20_WEK_FREQ_ID     |
| 38 | Moderate Exercise more than 30 min per a week | MOV30_WEK_FREQ_ID     |

---
